# Supplementary material
Source: ML conference proceedings conference paper supplement (https://proceedings.neurips.cc/paper_files/paper/2019/hash/c9efe5f26cd17ba6216bbe2a7d26d490-Abstract.html)
Supplement: Supplementary file [file c9efe5f26cd17ba6216bbe2a7d26d490-Supplemental.zip]

---

# Supplementary Materials: Time-series Generative Adversarial Networks

---

**Jinsung Yoon\***

University of California, Los Angeles, USA  
jsyoon0823@g.ucla.edu

**Daniel Jarrett\***

University of Cambridge, UK  
daniel.jarrett@maths.cam.ac.uk

**Mihaela van der Schaar**

University of Cambridge, UK  
University of California, Los Angeles, USA  
Alan Turing Institute, UK  
mv472@cam.ac.uk, mihaela@ee.ucla.edu

## Additional Related Work

TimeGAN integrates ideas from autoregressive models for sequence prediction [1, 2, 3], GAN-based methods for sequence generation [4, 5, 6], and time-series representation learning [7, 8, 9]—the relation and details for which are discussed in the main manuscript. In this section, we additionally discuss methods related on the periphery, including RNN-based sequence models using variational autoencoders, as well as GAN-based approaches for semi-supervised learning.

RNN-based models have been combined with variational autoencoders to generate sequences. In [10], this was done by learning to map *entire sequences* to single latent vectors, with the goal of capturing high-level properties of sequences and interpolating in latent space. This idea was extended to the general time-series setting [11], with the additional proposal that the trained weights and network states can be used to initialize standard RNN models. However, in both cases sampling from the prior over these representations involved but a simple deterministic decoder, so the only source of variability is found in the conditional output probability model. On the other hand, [12] proposed augmenting the representational power of the standard RNN model with stochastic latent variables *at each time step*. Recognizing that model variability should induce dependencies across time steps, [13] further extended this approach to accommodate temporal dependencies between latent random variables, and [14] explicitly layer a state space model on top of the RNN structure. In parallel, this technique has since been applied to temporal convolutional models of sequences as well, with stochastic latent variables injected into the WaveNet structure [15]. However, the focus of these methods is specifically on encoding sufficient input variability to model highly structured data (such as speech and handwriting). In particular, they do not ensure that new sequences unconditionally sampled from the model match the underlying distribution of the training data. By contrast, TimeGAN focuses on learning the entire (joint) distribution such that sampled data match the original, while simultaneously ensuring that the model respects the (conditional) dynamics of the original data.

It is also worth mentioning that our method bears superficial resemblance to GAN-based approaches for semi-supervised learning. With methods such as [18, 19, 20], the task of interest is one of supervised classification, with an auxiliary unsupervised loss for generating additional unlabeled examples for training. Conversely, the focus of TimeGAN is on the unsupervised task of generative modeling, with an auxiliary supervised loss to provide additional control over the network’s dynamics.

---

\* indicates equal contribution

Table 1: Summary of Related Work. (Open-loop: Previous outputs are used as conditioning information for generation at each step; Mixed-variables: Accommodates static & temporal variables).

|                   | C-RNN-GAN<br>[4] | RCGAN<br>[5] | T-Forcing<br>[16, 17] | P-Forcing<br>[2] | TimeGAN<br>(Ours) |
|-------------------|------------------|--------------|-----------------------|------------------|-------------------|
| Stochastic        | ✓                | ✓            |                       |                  | ✓                 |
| Open-loop         | ✓                |              | ✓                     | ✓                | ✓                 |
| Adversarial loss  | ✓                | ✓            |                       | ✓                | ✓                 |
| Supervised loss   |                  |              | ✓                     | ✓                | ✓                 |
| Discrete features |                  |              |                       | ✓                | ✓                 |
| Embedding space   |                  |              |                       |                  | ✓                 |
| Mixed-variables   |                  |              |                       |                  | ✓                 |

## Additional Illustrations

Figure 1(b) in the main manuscript details the training scheme for TimeGAN. For side-by-side comparison, Figure 1(a) below additionally illustrates the training scheme for existing methods C-RNN-GAN and RCGAN, which employ the standard GAN setup during training. Furthermore, Figure 1(b) also compares the flow of data during sampling time for TimeGAN and these existing methods.

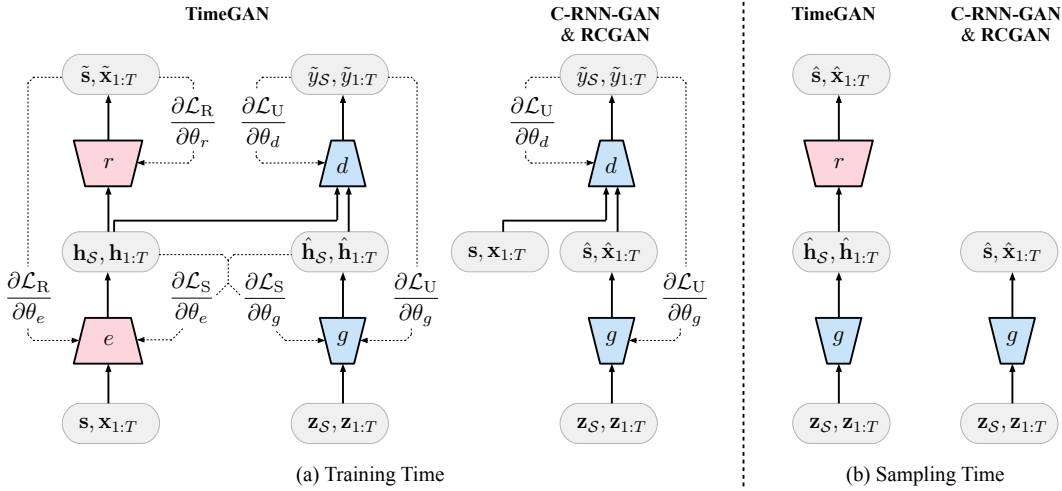

Figure 1: Block diagram of our proposed method (TimeGAN), shown here in comparison with existing methods (C-RNN-GAN and RCGAN) during (a) training time, as well as (b) sampling time. Solid lines indicate forward propagation of data, and dashed lines indicate backpropagation of gradients.

## Hyperparameters and Benchmarks

We use tensorflow to implement TimeGAN; source code will be made available after acceptance. All of the components (embedding network, generator, and discriminator) are implemented with 3-layer GRUs with hidden dimensions 4 times the size of the input features. The dimension of the latent space is half that of the input features. We use tanh as the activation function and sigmoid as the output layer activation function such that outputs are within the  $[0, 1]$  range. We also normalize the dataset to the  $[0, 1]$  range using min-max scaling. We set  $\lambda = 1$  and  $\eta = 10$  in our experiments.

We use the following publicly available source code to implement our benchmarks.

- C-RNN-GAN [4]: <https://github.com/olofmogren/c-rnn-gan>
- RCGAN [5]: <https://github.com/ratschlab/RCGAN>

- T-Forcing [16]: <https://github.com/snowkylin/rnn-handwriting-generation>
- P-Forcing [2]: [https://github.com/anirudh9119/LM\\_GANS](https://github.com/anirudh9119/LM_GANS)
- WaveNet [21]: <https://github.com/ibab/tensorflow-wavenet>
- WaveGAN [22]: <https://github.com/chrisdonahue/wavegan>

For fair comparison, we use the same underlying recurrent neural network architecture (3-layer GRUs with hidden dimensions 4 times the size of input features) for C-RNN-GAN, RCGAN, T-Forcing, and P-Forcing as is used in TimeGAN. In the case of deterministic models (such as T-Forcing and P-Forcing), we first train an original GAN model to generate feature vectors as inputs for the initial time step, which follows the original feature distribution at the initial time step. Then, using the generated feature vector as input, we initialize the model to generate the sequence in open-loop mode. Finally, the post-hoc time-series classification and sequence-prediction models are implemented as 2-layer LSTMs with hidden dimensions 4 times the size of the input features. As before, we use tanh as the activation function and sigmoid as the output layer activation function such that outputs are within the  $[0, 1]$  range.

## Additional Dataset Statistics

Table 2: Additional Dataset Statistics

| Dataset | Sequences | Dim. | Avg. Len. | Feature Corr. | Temporal Variance | Temporal Corr. |
|---------|-----------|------|-----------|---------------|-------------------|----------------|
| Sines   | 10,000    | 5    | 24 pts    | 0.0117        | 0.3167            | 0.2056         |
| Stocks  | 3,773     | 6    | 24 days   | 0.8596        | 0.0129            | 0.9902         |
| Energy  | 19,711    | 29   | 24 hrs    | 0.2843        | 0.0444            | 0.8506         |
| Events  | 149,967   | 54   | 58 events | 0.0095        | 0.0622            | 0.0744         |

The Google Stocks dataset is available online, and can be downloaded from: [LINK](#). The UCI Appliances Energy Prediction dataset is also available online, and can be downloaded from: [LINK](#).

## Algorithm Pseudocode

---

### Algorithm 1 Pseudocode of TimeGAN

---

```

1: Input:  $\lambda = 1, \eta = 10, \mathcal{D}$ , batch size  $n_{mb}$ , learning rate  $\gamma$ 
2: Initialize:  $\theta_e, \theta_r, \theta_g, \theta_d$ 
3: while Not converged do
4:   (1) Map between Feature Space and Latent Space
5:   Sample  $(\mathbf{s}_1, \mathbf{x}_{1:1:T_n}), \dots, (\mathbf{s}_{n_{mb}}, \mathbf{x}_{n_{mb},1:T_{n_{mb}}}) \stackrel{\text{i.i.d.}}{\sim} \mathcal{D}$ 
6:   for  $n = 1, \dots, n_{mb}, t = 1, \dots, T_n$  do
7:      $(\mathbf{h}_{n,S}, \mathbf{h}_{n,t}) = (e_S(\mathbf{s}_n), e_{\mathcal{X}}(\mathbf{h}_{n,S}, \mathbf{h}_{n,t-1}, \mathbf{x}_{n,t}))$ 
8:      $(\tilde{\mathbf{s}}_n, \tilde{\mathbf{x}}_{n,t}) = (r_S(\mathbf{h}_{n,S}), r_{\mathcal{X}}(\mathbf{h}_{n,t}))$ 
9:
10:  (2) Generate Synthetic Latent Codes
11:  Sample  $(\mathbf{z}_{S,1}, \mathbf{z}_{1:1:T_n}), \dots, (\mathbf{z}_{S,n_{mb}}, \mathbf{z}_{n_{mb},1:T_{n_{mb}}}) \stackrel{\text{i.i.d.}}{\sim} p_{Z_{S \times \mathcal{X}}}$ 
12:  for  $n = 1, \dots, n_{mb}, t = 1, \dots, T_n$  do
13:     $(\hat{\mathbf{h}}_{n,S}, \hat{\mathbf{h}}_{n,t}) = (g_S(\mathbf{z}_{S,n}), g_{\mathcal{X}}(\hat{\mathbf{h}}_{n,S}, \hat{\mathbf{h}}_{n,t-1}, \mathbf{z}_{n,t}))$ 
14:
15:  (3) Distinguish between Real and Synthetic Codes
16:  for  $n = 1, \dots, n_{mb}, t = 1, \dots, T_n$  do
17:     $(y_{n,S}, y_{n,t}) = (d_S(\mathbf{h}_{n,S}), d_{\mathcal{X}}(\tilde{\mathbf{u}}_{n,t}, \tilde{\mathbf{u}}_{n,t}))$ 
18:     $(\hat{y}_{n,S}, \hat{y}_{n,t}) = (d_S(\hat{\mathbf{h}}_{n,S}), d_{\mathcal{X}}(\hat{\tilde{\mathbf{u}}}_{n,t}, \hat{\tilde{\mathbf{u}}}_{n,t}))$ 
19:
20:  (4) Compute Reconstruction ( $\hat{\mathcal{L}}_R$ ), Unsupervised ( $\hat{\mathcal{L}}_U$ ), and Supervised ( $\hat{\mathcal{L}}_S$ ) Losses
21:     $\hat{\mathcal{L}}_R = \frac{1}{n_{mb}} \sum_{n=1}^{n_{mb}} [\|\mathbf{s}_n - \tilde{\mathbf{s}}_n\|_2 + \sum_t \|\mathbf{x}_{n,t} - \tilde{\mathbf{x}}_{n,t}\|_2]$ 
22:     $\hat{\mathcal{L}}_U = \frac{1}{n_{mb}} \sum_{n=1}^{n_{mb}} [\log y_{n,S} + \sum_t \log y_{n,t}] + [\log(1 - \hat{y}_{n,S}) + \sum_t \log(1 - \hat{y}_{n,t})]$ 
23:     $\hat{\mathcal{L}}_S = \frac{1}{n_{mb}} \sum_{n=1}^{n_{mb}} [\sum_t \|\mathbf{h}_{n,t} - g_{\mathcal{X}}(\mathbf{h}_{n,S}, \mathbf{h}_{n,t-1}, \mathbf{z}_{n,t})\|_2]$ 
24:
25:  (5) Update  $\theta_e, \theta_r, \theta_g, \theta_d$  via Stochastic Gradient Descent (SGD)
26:     $\theta_e = \theta_e - \gamma \nabla_{\theta_e} - [\lambda \hat{\mathcal{L}}_S + \hat{\mathcal{L}}_R]$ 
27:     $\theta_r = \theta_r - \gamma \nabla_{\theta_r} - [\lambda \hat{\mathcal{L}}_S + \hat{\mathcal{L}}_R]$ 
28:     $\theta_g = \theta_g - \gamma \nabla_{\theta_g} - [\eta \hat{\mathcal{L}}_S + \hat{\mathcal{L}}_U]$ 
29:     $\theta_d = \theta_d + \gamma \nabla_{\theta_d} - \hat{\mathcal{L}}_U$ 
30:
31:  (6) Synthetic Data Generation
32:  (6-1) Sample  $(\mathbf{z}_{S,1}, \mathbf{z}_{1:1:T_n}), \dots, (\mathbf{z}_{S,N}, \mathbf{z}_{N,1:T_N}) \stackrel{\text{i.i.d.}}{\sim} p_{Z_{S \times \mathcal{X}}}$ 
33:  (6-2) Generate synthetic latent codes
34:  for  $n = 1, \dots, N, t = 1, \dots, T_n$  do
35:     $(\hat{\mathbf{h}}_{n,S}, \hat{\mathbf{h}}_{n,t}) = (g_S(\mathbf{z}_{S,n}), g_{\mathcal{X}}(\hat{\mathbf{h}}_{n,S}, \hat{\mathbf{h}}_{n,t-1}, \mathbf{z}_{n,t}))$ 
36:  (6-3) Mapping to the feature space
37:  for  $n = 1, \dots, N, t = 1, \dots, T_n$  do
38:     $(\hat{\mathbf{s}}_n, \hat{\mathbf{x}}_{1:T_n}) = (r_S(\hat{\mathbf{h}}_{n,S}), r_{\mathcal{X}}(\hat{\mathbf{h}}_{n,t}))$ 
39:
40: Output:  $\hat{\mathcal{D}} = \{\hat{\mathbf{s}}_n, \hat{\mathbf{x}}_{1:T_n}\}_{n=1}^N$ 

```

---

## Additional Visualizations with t-SNE and PCA

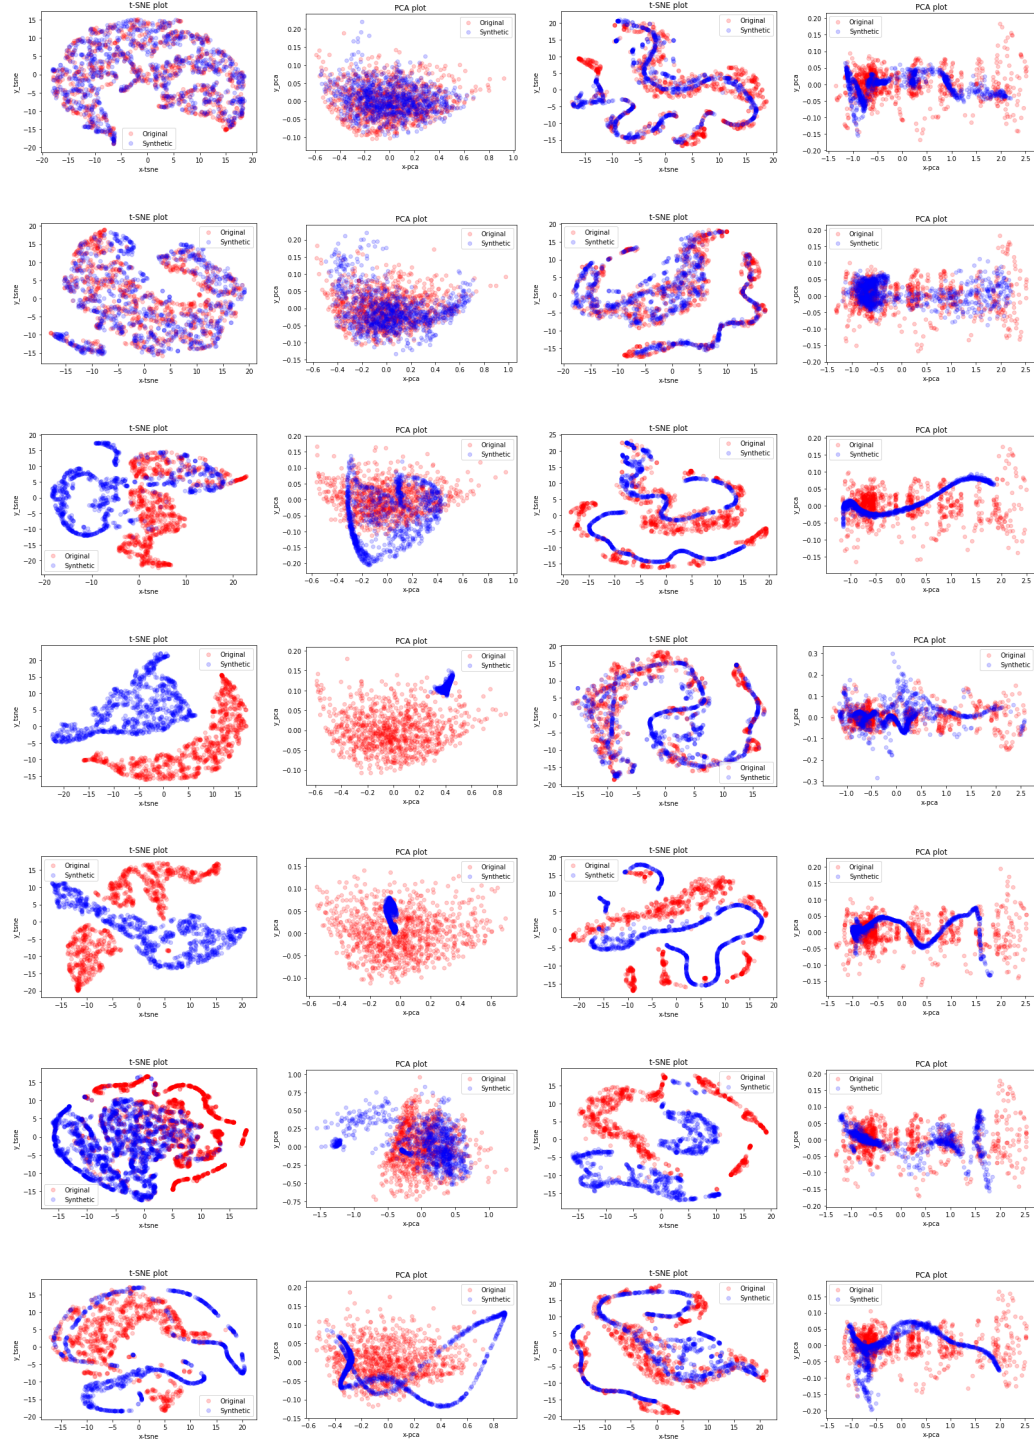

Figure 2: t-SNE (1<sup>st</sup> column) and PCA (2<sup>nd</sup> column) visualizations on Sines, and t-SNE (3<sup>rd</sup> column) and PCA (4<sup>th</sup> column) visualizations on Stocks. Each row provides the visualization for each of the 7 benchmarks, ordered as follows: (1) TimeGAN, (2) RCGAN, (3) C-RNN-GAN, (4) T-Forcing, (5) P-Forcing, (6) WaveNet, and (7) WaveGAN. Red denotes original data, and blue denotes synthetic.

## References

- [1] Samy Bengio, Oriol Vinyals, Navdeep Jaitly, and Noam Shazeer. Scheduled sampling for sequence prediction with recurrent neural networks. In *Advances in Neural Information Processing Systems*, pages 1171–1179, 2015.
- [2] Alex M Lamb, Anirudh Goyal Alias Parth Goyal, Ying Zhang, Saizheng Zhang, Aaron C Courville, and Yoshua Bengio. Professor forcing: A new algorithm for training recurrent networks. In *Advances In Neural Information Processing Systems*, pages 4601–4609, 2016.
- [3] Vijay R Konda and John N Tsitsiklis. Actor-critic algorithms. In *Advances in neural information processing systems*, pages 1008–1014, 2000.
- [4] Olof Mogren. C-rnn-gan: Continuous recurrent neural networks with adversarial training. *arXiv preprint arXiv:1611.09904*, 2016.
- [5] Cristóbal Esteban, Stephanie L Hyland, and Gunnar Rätsch. Real-valued (medical) time series generation with recurrent conditional gans. *arXiv preprint arXiv:1706.02633*, 2017.
- [6] Giorgia Ramponi, Pavlos Protopapas, Marco Brambilla, and Ryan Janssen. T-cgan: Conditional generative adversarial network for data augmentation in noisy time series with irregular sampling. *arXiv preprint arXiv:1811.08295*, 2018.
- [7] Anders Boesen Lindbo Larsen, Søren Kaae Sønderby, Hugo Larochelle, and Ole Winther. Autoencoding beyond pixels using a learned similarity metric. *arXiv preprint arXiv:1512.09300*, 2015.
- [8] Vincent Dumoulin, Ishmael Belghazi, Ben Poole, Olivier Mastropietro, Alex Lamb, Martin Arjovsky, and Aaron Courville. Adversarially learned inference. *arXiv preprint arXiv:1606.00704*, 2016.
- [9] Alireza Makhzani, Jonathon Shlens, Navdeep Jaitly, Ian Goodfellow, and Brendan Frey. Adversarial autoencoders. *arXiv preprint arXiv:1511.05644*, 2015.
- [10] Samuel R Bowman, Luke Vilnis, Oriol Vinyals, Andrew M Dai, Rafal Jozefowicz, and Samy Bengio. Generating sentences from a continuous space. *arXiv preprint arXiv:1511.06349*, 2015.
- [11] Otto Fabius and Joost R van Amersfoort. Variational recurrent auto-encoders. *arXiv preprint arXiv:1412.6581*, 2014.
- [12] Justin Bayer and Christian Osendorfer. Learning stochastic recurrent networks. *arXiv preprint arXiv:1411.7610*, 2014.
- [13] Junyoung Chung, Kyle Kastner, Laurent Dinh, Kratarth Goel, Aaron C Courville, and Yoshua Bengio. A recurrent latent variable model for sequential data. In *Advances in neural information processing systems*, pages 2980–2988, 2015.
- [14] Marco Fraccaro, Søren Kaae Sønderby, Ulrich Paquet, and Ole Winther. Sequential neural models with stochastic layers. In *Advances in neural information processing systems*, pages 2199–2207, 2016.
- [15] Guokun Lai, Bohan Li, Guoqing Zheng, and Yiming Yang. Stochastic wavenet: A generative latent variable model for sequential data. *arXiv preprint arXiv:1806.06116*, 2018.
- [16] Alex Graves. Generating sequences with recurrent neural networks. *arXiv preprint arXiv:1308.0850*, 2013.
- [17] Ilya Sutskever, James Martens, and Geoffrey E Hinton. Generating text with recurrent neural networks. In *Proceedings of the 28th International Conference on Machine Learning (ICML-11)*, pages 1017–1024, 2011.
- [18] Durk P Kingma, Shakir Mohamed, Danilo Jimenez Rezende, and Max Welling. Semi-supervised learning with deep generative models. In *Advances in neural information processing systems*, pages 3581–3589, 2014.

- [19] Abhishek Kumar, Prasanna Sattigeri, and Tom Fletcher. Semi-supervised learning with gans: Manifold invariance with improved inference. In *Advances in Neural Information Processing Systems*, pages 5534–5544, 2017.
- [20] Takumi Kobayashi. Gan-based semi-supervised learning on fewer labeled samples.
- [21] Aäron Van Den Oord, Sander Dieleman, Heiga Zen, Karen Simonyan, Oriol Vinyals, Alex Graves, Nal Kalchbrenner, Andrew W Senior, and Koray Kavukcuoglu. Wavenet: A generative model for raw audio. *SSW*, 125, 2016.
- [22] Chris Donahue, Julian McAuley, and Miller Puckette. Adversarial audio synthesis. *arXiv preprint arXiv:1802.04208*, 2018.
